# Early-to-Mid Gestation Fetal Testosterone Increases Right Hand 2D:4D Finger Length Ratio in Polycystic Ovary Syndrome-Like Monkeys

Andrew D. Abbott<sup>1\*</sup>, Ricki J. Colman<sup>1</sup>, Ross Tiefenthaler<sup>1</sup>, Daniel A. Dumesic<sup>1,4</sup>, David H. Abbott<sup>1,2,3</sup>

**1** Wisconsin National Primate Research Center, University of Wisconsin, Madison, Wisconsin, United States of America, **2** Department of Obstetrics and Gynecology, University of Wisconsin, Madison, Wisconsin, United States of America, **3** Endocrinology-Reproductive Physiology Program, University of Wisconsin, Madison, Wisconsin, United States of America, **4** Department of Obstetrics and Gynecology, David Geffen School of Medicine at the University of California Los Angeles, Los Angeles, California, United States of America

## Abstract

A smaller length ratio for the second relative to the fourth finger (2D:4D) is repeatedly associated with fetal male-typical testosterone (T) and is implicated as a biomarker for a variety of traits and susceptibility to a number of diseases, but no experimental human studies have been performed. The present study utilizes the rhesus monkey, a close relative of humans, and employs discrete gestational exposure of female monkeys to fetal male-typical T levels for 15–35 days during early-to-mid (40–76 days;  $n=7$ ) or late (94–139 days;  $n=7$ ) gestation (term: 165 days) by daily subcutaneous injection of their dams with 10 mg T propionate. Such gestational exposures are known to enhance male-typical behavior. In this study, compared to control females ( $n=19$ ), only early-to-mid gestation T exposure virilizes female external genitalia while increasing 2D:4D ratio in the right hand (RH) by male-like elongation of RH2D. RH2D length and 2D:4D positively correlate with androgen-dependent anogenital distance (AG), and RH2D and AG positively correlate with duration of early-to-mid gestation T exposure. Male monkeys ( $n=9$ ) exhibit a sexually dimorphic 2D:4D in the right foot, but this trait is not emulated by early-to-mid or late gestation T exposed females. X-ray determined phalanx measurements indicate elongated finger and toe phalanx length in males, but no other phalanx-related differences. Discrete T exposure during early-to-mid gestation in female rhesus monkeys thus appears to increase RH2D:4D through right-side biased, non-skeletal tissue growth. As variation in timing and duration of gestational T exposure alter male-like dimensions of RH2D independently of RH4D, postnatal RH2D:4D provides a complex biomarker for fetal T exposure.

**Citation:** Abbott AD, Colman RJ, Tiefenthaler R, Dumesic DA, Abbott DH (2012) Early-to-Mid Gestation Fetal Testosterone Increases Right Hand 2D:4D Finger Length Ratio in Polycystic Ovary Syndrome-Like Monkeys. *PLoS ONE* 7(8): e42372. doi:10.1371/journal.pone.0042372

**Editor:** Samuli Helle, University of Turku, Finland

**Received:** March 6, 2012; **Accepted:** July 5, 2012; **Published:** August 22, 2012

**Copyright:** © 2012 Abbott et al. This is an open-access article distributed under the terms of the Creative Commons Attribution License, which permits unrestricted use, distribution, and reproduction in any medium, provided the original author and source are credited.

**Funding:** This work was supported in part by National Institutes of Health grants R01 RR013635, U01 HD044650, P51 RR000167 (Wisconsin National Primate Research Centre (WNPRC) base operating grant), and was partly conducted at a facility (WNPRC) constructed with support from Research Facilities Improvement Program grant numbers RR15459-01 and RR020141-01. The funders had no role in study design, data collection and analysis, decision to publish, or preparation of the manuscript.

**Competing Interests:** ADA - son of David Abbott, David Abbott - consultant for Viamet Pharmaceuticals Inc., Morrisville, North Carolina. This does not alter the authors' adherence to all the PLoS ONE policies on sharing data and materials.

\* E-mail: aabbott@primate.wisc.edu

## Introduction

The sexually dimorphic digit ratio between the length of the second (index) finger and the length of the fourth (ring) finger (2D:4D) has long been established as smaller in men compared to women [1]. Fetal testosterone (T) exposure spanning early-to-mid gestation [2] has been repeatedly implicated in the development of sexual dimorphism in 2D:4D [3–6]. This finger length ratio has achieved prominence because of its association with a variety of human diseases in men and women: men, prostate, testicular and oral cancer [7–9], infertility [8], autism [10], attention deficit disorder [11] and eating disorders [12]; women, breast and cervical cancer [13,14], autism [15,16], congenital adrenal hyperplasia (CAH) [5], and polycystic ovary syndrome (PCOS) [17]. Due to the apparent influence of fetal T exposure on 2D:4D and the latter's association with human disease, 2D:4D has been proposed as a faithful postnatal biomarker for gestational exposure to T and its associated risk of pathophysiology [3,18,19].

Supporting evidence for fetal testosterone differentiation of 2D:4D in humans is provided by genetically-determined androgenic abnormalities, including classical CAH – a hypocortisolemic condition commonly caused by 21-hydroxylase deficiency, that exposes fetuses to abnormally high levels of adrenal androgens [20,21]. Women with classic (early gestation onset [22]) CAH exhibit masculinized physical and behavioral characteristics as well as lower, more male-like 2D:4D [5]. Buck and colleagues [23], however, using only left hand measures that show a less pronounced differential in 2D:4D [3,24,25], fail to show a smaller 2D:4D in women with CAH. In contrast to 46,XX CAH individuals, 46,XY individuals suffering from complete androgen insensitivity syndrome (CAIS) present with a female-like 2D:4D [19] when T action is absent lifelong.

Thus, while associative findings from human studies are mostly supportive of the hypothesis that fetal male-typical T levels determine male-like 2D:4D, a controlled, experimental study confirming fetal T action on 2D:4D has not been performed. In

this regard, the experimentally-controlled exposure of female rhesus monkeys (*Macaca mulatta*) to fetal male levels of T provides a nonhuman primate model in which to determine the 2D:4D consequence of fetal exposure to a known duration of fetal male-typical T exposure [26]. Such T-exposed, prenatally androgenized (PA) female monkeys display more male-typical behavior [27–29], regardless of whether female fetuses are exposed to T during either early-to-mid or late gestation [28,30,31]. PA monkeys also show varying degrees of masculinized genitalia, including a male-like anogenital distance [30,32], but only when fetal exposure to T is initiated during early gestation [28,29,33].

PA female rhesus monkeys exposed to T during either early-to-mid or late gestation also demonstrate signs and symptoms of PCOS, a common syndrome of T excess in women [34–37]. PCOS-like traits are most prominent in female monkeys exposed to fetal male-typical T levels during early-to-mid gestation and include ovarian and adrenal androgen excess, intermittent or absent menstrual cycles, polycystic ovaries, increased adiposity, hyperlipidemia, insulin resistance and impaired insulin secretion, as well as increased incidence of type 2 diabetes mellitus [34–40]. Such comprehensive reproductive, endocrine and metabolic sequelae of female fetal T exposure suggest pathophysiological developmental impact on multiple organ systems, potentially by means of epigenetic programming [41].

The objective of this pilot study is to determine whether fetal male-typical T exposure induces a smaller 2D:4D ratio in a female monkey model for PCOS. Identifying fetal origins for such a lower ratio in a nonhuman primate could re-affirm 2D:4D as a

biomarker for both fetal T exposure and PCOS. Rhesus monkeys have a mildly smaller, sexually dimorphic 2D:4D finger length ratio [24], and we hypothesize that developing females exposed *in-utero* to male-typical T at the end of the 1<sup>st</sup> to mid-2<sup>nd</sup> trimester (early-to-mid gestation) demonstrate a more masculinized 2D:4D [2].

## Results

### Selected somatic, reproductive and endocrine characteristics of monkey groups

Aspects of adult phenotypic features related to fetal T exposure are summarized in Table 1. While none of the female groups differed with respect to age, body weight and BMI, males were slightly older than control ( $p < 0.016$ , partial eta squared ( $\eta^2_p$ ) = 0.29; effect size [42–44]) and LPA ( $p < 0.006$ ,  $\eta^2_p = 0.29$ ) females. Compared to all three female groups, however, and typical of rhesus monkey sexual dimorphism, males were heavier ( $p < 2.6 \times 10^{-4}$ ,  $\eta^2_p = 0.53$ ), exhibited greater crown-rump length ( $p < 0.033$ ,  $\eta^2_p = 0.35$ ), longer anogenital distance ( $p < 1.8 \times 10^{-4}$ ,  $\eta^2_p = 0.95$ ), and had greater BMI ( $p < 0.05$ ,  $\eta^2_p = 0.26$ ). Anogenital distance, a measure of early gestation T exposure, indicated that EPA females exhibited more male-typical dimensions than control or LPA females. EPA females, nevertheless, did not display the same extension of anogenital distance as manifest by males ( $p < 1.8 \times 10^{-4}$ ).

Adult female monkey traits relevant to a PCOS-like condition include high basal T levels, intermittent or absent menstrual cycles

**Table 1.** Somatometric and PCOS-like traits, right hand 2<sup>nd</sup> digit length and 2D:4D finger length ratio, in control (n = 19), early (EPA, n = 7) and late (LPA, n = 7) prenatally androgenized female and control male (n = 9) rhesus monkeys.

|                               | Control female             | EPA                            | LPA                        | Male          |
|-------------------------------|----------------------------|--------------------------------|----------------------------|---------------|
| Age (Years)                   | 20.3 ± 0.6 <sup>a</sup>    | 21.5 ± 0.9                     | 19.0 ± 0.9 <sup>m</sup>    | 23.4 ± 0.8    |
| Body Weight (kg)              | 8.8 ± 0.4 <sup>b</sup>     | 8.6 ± 0.6 <sup>c</sup>         | 8.8 ± 0.6 <sup>n</sup>     | 12.6 ± 0.5    |
| BMI (kg/m <sup>2</sup> )      | 38.4 ± 1.6 <sup>a</sup>    | 36.5 ± 2.6 <sup>c</sup>        | 37.6 ± 2.6 <sup>l</sup>    | 47.3 ± 2.4    |
| CR Length (cm)                | 48.0 ± 0.5 <sup>b</sup>    | 48.7 ± 0.8 <sup>c</sup>        | 48.3 ± 0.8 <sup>l</sup>    | 51.8 ± 0.7    |
| AG Distance (mm)              | 18.4 ± 5.0 <sup>b</sup>    | 94.6 ± 6.3 <sup>e,h,j</sup>    | 15.0 ± 7.0 <sup>n</sup>    | 151.7 ± 5.3   |
| Basal T (ng/mL)               | 0.21 ± 0.05                | 0.34 ± 0.04                    | 0.27 ± 0.05                | n.a.          |
| Hyperandrogenic (≥0.32 ng/mL) | 0%                         | 57%                            | ≥43%                       | n.a.          |
| Polyfollicular Ovaries        | n.a.                       | 71%                            | ≥29%                       | n.a.          |
| Menstrual Cycle (Days)        | 28 (27, 34)                | 52 (35, 70) <sup>g</sup>       | 39 (31, 62) <sup>o</sup>   | n.a.          |
| Intermittent/Anovulatory (%)  | ≥10%                       | 86%                            | ≥57%                       | n.a.          |
| RH 2D Length (cm)             | 3.215 ± 0.046 <sup>b</sup> | 3.443 ± 0.067 <sup>f</sup>     | 3.278 ± 0.067 <sup>l</sup> | 3.569 ± 0.055 |
| RH 2D:4D                      | 0.817 ± 0.012              | 0.884 ± 0.014 <sup>d,i,k</sup> | 0.815 ± 0.015              | 0.799 ± 0.011 |

CR: Crown-Rump, AG: Anogenital, Data are shown as mean ± SEM or median (range).

<sup>a</sup>Control Female < Male, 0.01 < p < 0.05.

<sup>b</sup>Control Female < Male, p < 0.001.

<sup>c</sup>EPA < Male, 0.01 < p < 0.05.

<sup>d</sup>EPA < Male, 0.001 < p < 0.01.

<sup>e</sup>EPA < Male, p < 0.001.

<sup>f</sup>EPA > Control Female, 0.01 < p < 0.05.

<sup>g</sup>EPA > Control Female, 0.001 < p < 0.01.

<sup>h</sup>EPA > Control Female, p < 0.001.

<sup>i</sup>EPA > LPA, 0.01 < p < 0.05.

<sup>j</sup>EPA > LPA, p < 0.001.

<sup>k</sup>EPA > Male, p < 0.001.

<sup>l</sup>LPA < Male, 0.01 < p < 0.05.

<sup>m</sup>LPA < Male, 0.001 < p < 0.01.

<sup>n</sup>LPA < Male, p < 0.001.

<sup>o</sup>LPA > Control Female, 0.01 < p < 0.05.

doi:10.1371/journal.pone.0042372.t001

and the presence of polyfollicular ovaries. In this study, basal T levels from adult females during the early follicular phase of the menstrual cycle or anovulatory period, while similar between groups ( $p < 0.18$ ), averaged  $\sim 50\%$  higher in EPA compared to control females (Table 1). Four of seven EPA and three of seven LPA female basal testosterone levels met the previously established criteria for rhesus monkey hyperandrogenism ( $>1$  SD above normal control population mean [41]), demonstrating the presence of adult female hyperandrogenism in 50% of PA monkeys. Intermittent or absent menstrual cycles were found in both PA female groups as evidenced by increased intervals (Table 1) between ovulatory menstrual cycles. Polyfollicular ovaries, identified by trans-abdominal illumination of individual ovaries during the early follicular phase or anovulatory period, showed 71% and  $\geq 29\%$  incidence in EPA and LPA groups respectively ( $>10$ ,  $\sim 1\text{--}3$  mm follicles in one or both ovaries). Criteria for defining polyfollicular ovarian morphology were based on those for women [45] as monkey ovarian assessments were made prior to Rotterdam criteria ( $\geq 12$  follicles in any one ovary [46]).

### Lengths and ratios of digits

As typical for rhesus monkeys, all digit lengths in males were longer ( $p \leq 0.006$ ) than those in control females, except for 2D on the right foot (Table 2). The length of right hand 2D in EPA females was male-like, exhibiting increased length compared to control females, and being comparable in length to males (Figure 1a). Five of seven EPA, but only two of seven LPA, females exceeded control values for right hand 2D length. As there was no extension of the right hand 4D length in PA females (Figure 1b), right hand 2D:4D in EPA females exceeded that of control and LPA females, as well as that of males (Figure 1c). Remaining digit length ratios did not differ between male and female groups (Table 3, Figure 2), except for 2D:4D and 2D:3D in the right foot. In this latter regard, males showed an expected, sexually dimorphic smaller 2D:4D ratio compared to control females (Table 3, Figure 2) and emulated that sex differential in 2D:3D. Interestingly, EPA females showed no difference to controls.

### Lengths and ratios of phalanges and joint space width

Phalanx length and joint space width showed less pronounced sexual dimorphism than digit length (Table S1, data not shown, respectively). There was no sexual dimorphism in any phalanx length ratio (Table S2). There were no between female group differences in any phalanx or joint space width measurements.

### Associations with duration of fetal T exposure

Both anogenital distance (Figure 3:  $r^2 = 0.97$ ,  $p < 1.0 \times 10^{-5}$ ) and right hand 2D length (Figure 1g:  $r^2 = 0.62$ ,  $p < 6.0 \times 10^{-5}$ ) were positively influenced by the duration of fetal T exposure in EPA, but not LPA, females. No associations were found with right hand 4D length (Figure 1h), right hand 2D:4D (Figure 1i) or other finger, toe and phalanges, and joint space width parameters (data not shown).

### Associations between anogenital distance and right hand 2D and 2D:4D

Figure 1d illustrates the positive association ( $r^2 = 0.79$ ,  $p < 1.0 \times 10^{-4}$  between all female groups;  $r^2 = 0.76$ ,  $p < 1.0 \times 10^{-6}$  between all groups) linking anogenital and right hand 2D elongation. EPA females, with only early-to-mid gestation exposure to fetal male levels of T, are found in an intermediate

position between control and LPA females, and normal males, for both parameters (Figure 1d). There was no relationship ( $r^2 = 0.22$ ,  $p > 0.14$ ), however, between anogenital distance and right hand 4D length for female groups alone (Figure 1e). When including males with all female groups, right hand 4D length positively correlated with anogenital distance (Figure 1e:  $r^2 = 0.65$ ,  $p < 5.7 \times 10^{-5}$ ). A positive relationship ( $r^2 = 0.79$ ,  $p < 6.3 \times 10^{-4}$ ) between anogenital distance and right hand 2D:4D is found when only female groups are considered (Figure 1f).

## Discussion

In many studies, a smaller 2D:4D finger length ratio is repeatedly proposed as a reliable adult biomarker of fetal T exposure [3–5,7,47–51]. Developmental sex differences in 2D:4D start as early as 14 weeks of gestation in humans, at the beginning of the second trimester [52,53,54], and do not stabilize until at least two years of age [3]. The bony phalanges within the second digit, however, can increase throughout childhood, though only in the left hand [2]. Fetal T may enable preferential digit growth by stimulating the expression of a series of digit development genes, *Wnt5*, *Ihh*, *Bmp6*, *Fgf2*, *Igf1*, *Sox9* and *Runt2* [25], or through interaction with sexually dimorphic, differential expression of androgen and estrogen receptors [25].

**Table 2.** Mean ( $\pm$  SEM) digit length in control, early (EPA) and late (LPA) prenatally androgenized females and control male rhesus monkeys.

| Digit length      | Control female                 | EPA                            | LPA                            | Male              |
|-------------------|--------------------------------|--------------------------------|--------------------------------|-------------------|
| <b>Left hand</b>  |                                |                                |                                |                   |
| 2D                | 3.219 $\pm$ 0.056 <sup>a</sup> | 3.340 $\pm$ 0.096              | 3.349 $\pm$ 0.081              | 3.615 $\pm$ 0.076 |
| 3D                | 4.090 $\pm$ 0.076 <sup>b</sup> | 4.232 $\pm$ 0.127 <sup>c</sup> | 4.134 $\pm$ 0.114 <sup>i</sup> | 4.690 $\pm$ 0.090 |
| 4D                | 3.969 $\pm$ 0.065 <sup>b</sup> | 4.134 $\pm$ 0.104              | 4.080 $\pm$ 0.095 <sup>g</sup> | 4.480 $\pm$ 0.082 |
| <b>Right hand</b> |                                |                                |                                |                   |
| 2D                | 3.215 $\pm$ 0.046 <sup>b</sup> | 3.443 $\pm$ 0.067 <sup>f</sup> | 3.278 $\pm$ 0.067 <sup>g</sup> | 3.569 $\pm$ 0.055 |
| 3D                | 4.083 $\pm$ 0.065 <sup>b</sup> | 4.115 $\pm$ 0.097 <sup>c</sup> | - <sup>*</sup>                 | 4.543 $\pm$ 0.074 |
| 4D                | 3.932 $\pm$ 0.073 <sup>b</sup> | 3.858 $\pm$ 0.092 <sup>e</sup> | 3.966 $\pm$ 0.092 <sup>h</sup> | 4.464 $\pm$ 0.073 |
| <b>Left foot</b>  |                                |                                |                                |                   |
| 2D                | 3.230 $\pm$ 0.061 <sup>b</sup> | 3.428 $\pm$ 0.086              | 3.522 $\pm$ 0.106              | 3.669 $\pm$ 0.075 |
| 3D                | 4.413 $\pm$ 0.065 <sup>a</sup> | 4.500 $\pm$ 0.112              | 4.387 $\pm$ 0.102 <sup>g</sup> | 4.812 $\pm$ 0.083 |
| 4D                | 4.168 $\pm$ 0.071 <sup>a</sup> | 4.240 $\pm$ 0.101 <sup>c</sup> | 4.265 $\pm$ 0.109              | 4.614 $\pm$ 0.089 |
| <b>Right foot</b> |                                |                                |                                |                   |
| 2D                | 3.425 $\pm$ 0.059              | 3.386 $\pm$ 0.112              | 3.413 $\pm$ 0.103              | 3.557 $\pm$ 0.084 |
| 3D                | 4.420 $\pm$ 0.066 <sup>b</sup> | 4.532 $\pm$ 0.131              | 4.466 $\pm$ 0.117              | 4.831 $\pm$ 0.093 |
| 4D                | 4.206 $\pm$ 0.065 <sup>b</sup> | 4.055 $\pm$ 0.130 <sup>d</sup> | 4.215 $\pm$ 0.106 <sup>g</sup> | 4.678 $\pm$ 0.087 |

\*There were only two LPA females with intact phalanges in the 3<sup>rd</sup> digit of their right hand.

<sup>a</sup>Control Female < Male, 0.001 < p < 0.01.

<sup>b</sup>Control Female < Male, p < 0.001.

<sup>c</sup>EPA < Male, 0.01 < p < 0.05.

<sup>d</sup>EPA < Male, 0.001 < p < 0.01.

<sup>e</sup>EPA < Male, p < 0.001.

<sup>f</sup>EPA > Control Female, 0.01 < p < 0.05.

<sup>g</sup>LPA < Male, 0.01 < p < 0.05.

<sup>h</sup>LPA < Male, 0.001 < p < 0.01.

<sup>i</sup>LPA < Male, p < 0.001.

doi:10.1371/journal.pone.0042372.t002

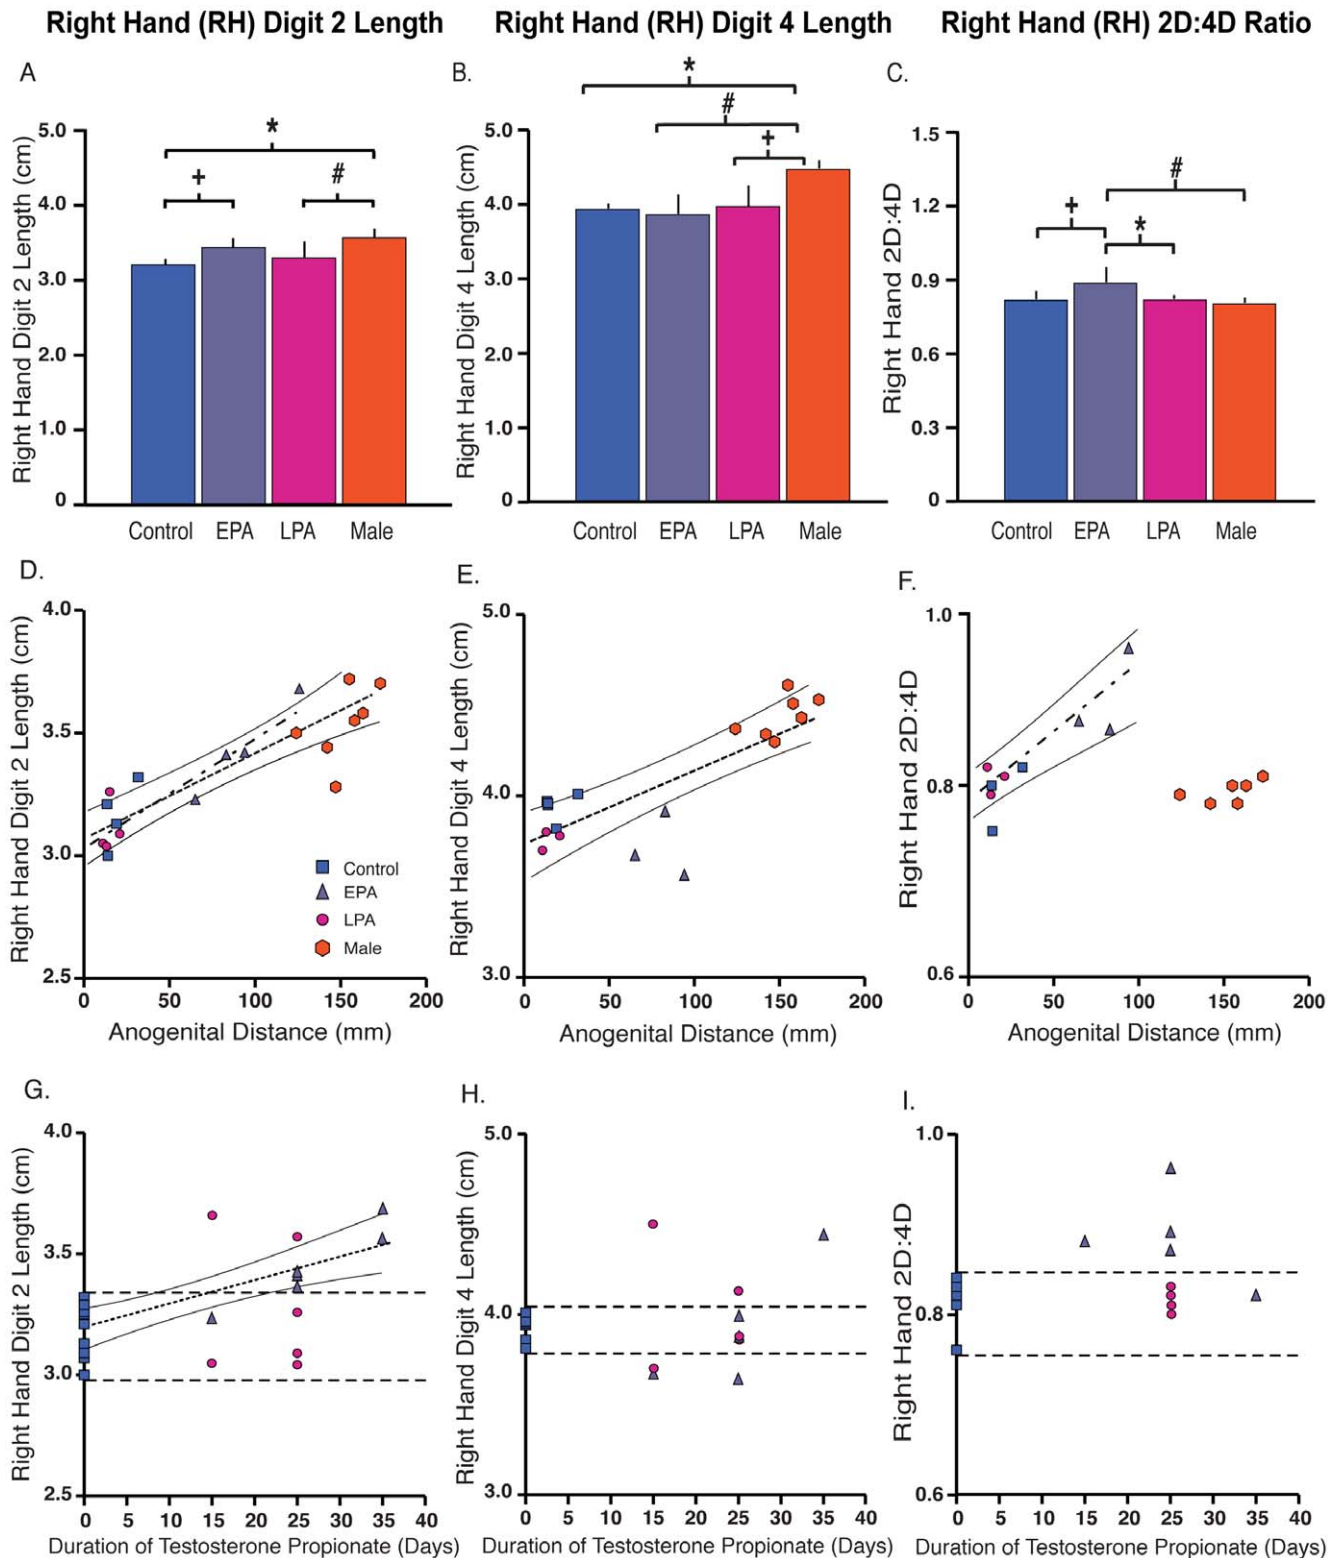

**Figure 1. Right hand (RH) finger parameters in adult control and early (EPA) and late (LPA) prenatally androgenized female and male rhesus monkeys.** (A) RH 2D finger length (<sup>a</sup>  $p < 2.9 \times 10^{-4}$ , Control < Male; <sup>b</sup>  $p < 0.041$ , EPA > Control; <sup>c</sup>  $p < 0.012$ , LPA < Male), (B) RH 4D finger length (<sup>d</sup>  $p < 3.6 \times 10^{-4}$ , Control < Male; <sup>e</sup>  $p < 3.6 \times 10^{-4}$ , EPA < Male; <sup>f</sup>  $p < 0.002$ , LPA < Male), (C) RH 2D:4D ratio (<sup>g</sup>  $p < 6.6 \times 10^{-4}$ , EPA > Male; <sup>h</sup>  $p < 0.009$  EPA > Control Female; <sup>i</sup>  $p < 0.016$ , EPA > LPA), (D) relationship between RH 2D finger length and anogenital distance (all groups, dashed line:  $r^2 = 0.76$ ,  $p < 1.0 \times 10^{-6}$ ; females only, dot-dash line:  $r^2 = 0.79$ ,  $p < 1.0 \times 10^{-4}$ ; 95% Confidence Interval (CI), solid lines), (E) relationship between RH 4D finger length and anogenital distance (all groups, dashed line:  $r^2 = 0.65$ ,  $p < 5.7 \times 10^{-5}$ ; females only, dot-dash line:  $r^2 = 0.79$ ,  $p < 6.3 \times 10^{-4}$ ; 95% CI, solid lines), (F) relationship between RH 2D:4D ratio and anogenital distance (all groups: n.s.; females only, dot-dash line:  $r^2 = 0.79$ ,  $p < 6.3 \times 10^{-4}$ ; 95% CI, solid lines), (G) relationship between RH 2D finger length and duration of gestational exposure to testosterone propionate (Control and EPA females only, dotted line:  $r^2 = 0.62$ ,

$p < 6.0 \times 10^{-5}$ ; 95% CI, solid lines), (H) relationship between RH 4D finger length and duration of gestational exposure to testosterone propionate (Control and EPA females only: n.s.), and (I) the relationship between RH 2D:4D ratio and duration of gestational exposure to testosterone propionate (Control and EPA females only: n.s.). Horizontal dashed lines indicate range of control female values (G–I).  
doi:10.1371/journal.pone.0042372.g001

### Fetal T exposure induces changes in 2D:4D in female rhesus monkeys

The current pilot study is the first to experimentally manipulate a nonhuman primate to test the hypothesis that fetal T exposure differentiates a smaller 2D:4D. Fetal female rhesus monkeys exposed to fetal male levels of T during either early-to-mid gestation (EPA monkeys) or mid-to-late gestation (LPA monkeys) [55,56] exhibit a variety of masculinized behavioral, physical and physiological traits including, respectively, mounting behavior, virilized genitalia and impaired steroid negative feedback on luteinizing hormone [28–32,36]. As anticipated from the studies of Manning, McIntyre, Lutchmaya and colleagues [3,4,6,7,47,57–59], only EPA female monkeys exhibit a significant difference in finger length ratio. In contrast to an expected smaller 2D:4D finger length ratio, however, EPA females demonstrate a relatively larger 2D:4D ratio finger length ratio compared to both normal control females and males, yet only in their right hands. This unexpected hyper-feminine ~8% increase in right hand 2D:4D ratio in EPA female monkeys is likely the product of an ~7% elongation in 2D finger length. The degree of increased finger length in EPA females is comparable to the ~11% greater length of 2D found in the right hand of normal males compared to control females. Right hand 2D elongation in EPA females, however, is without the accompanying ~13% longer right hand 4D, as found in males, hence the increased 2D:4D ratio in EPA females, but not in males.

EPA 2D finger elongation is highly predictive of the degree of masculinized (elongated) anogenital distance in EPA females. Such a predictive relationship between the degree of masculinized genitalia and right hand 2D finger length heavily contributes to the positive association between right hand 2D:4D finger length ratio and anogenital distance. The correlation with degree of masculinized genitalia remains for right hand 2D finger length, but not 2D:4D, when males are included. Female right hand 2D finger length also positively correlates with duration of fetal T exposure, when LPA females are excluded (LPA anogenital distance is unresponsive to T). 2D finger elongation in EPA females thus likely reflects the action of fetal T, or its locally derived androgenic or estrogenic metabolites, on finger traits determined during the critical period of early-to-mid gestation. Anogenital distance is crucial in providing understanding for this potential fetal mechanism since in rhesus monkeys, as in humans, anogenital distance is an established biomarker of the duration of fetal T exposure (as confirmed by this study), mostly through the action of its locally derived androgenic metabolite, dihydrotestosterone, during early-to-mid, but not late, gestation [29,30,32,33,60]. EPA female rhesus monkeys display male-like elongation of their anogenital distance in addition to obvious virilization of their external genitalia (phallus and scrotum). Thus, in female rhesus monkeys during early-to-mid gestation, duration of exposure to fetal male-typical T levels incrementally increases both anogenital distance and right hand 2D finger length, suggesting that androgen action on the two anatomical differentiation events may be temporally linked.

### Right-sided bias for 2D:4D

Right-sided bias in digit ratio differences also occurs in humans, other nonhuman primates, and non-primate mammals [24,25,61,62]. In humans, the magnitude of the sex difference in 2D:4D can be greater in the right than the left hand [18,51,62],

possibly because male-typical fetal T levels increase the degree of bias in right-sided lateralization together with lower 2D:4D [18,51,63–65]. Right-sided bias in human 2D:4D is positively associated with tissue oxygen uptake and physical performance [62,66,67] and may therefore contribute survival advantages. Studies, however, are inconsistent as to whether right-sided bias in human 2D:4D is [62,68–72] or is not [73,74] associated with an increase in left-handedness as part of a functional asymmetry and cerebral lateralization [75]. A larger right hand 2D:4D, however, is associated with right handedness in both men and women [70]. Monkey handedness was not determined in the current study.

### Potential mechanisms of fetal T induced changes in 2D:4D

Sexually dimorphic 2D:4D finger length ratios are not unusual in nonhuman primates [58,76] and manifest together with additional sexually dimorphic ratios for phalanges, metacarpals and metatarsals in both hands and feet [77,78]. Sexual dimorphism in baboon, gorilla and chimpanzee metacarpal and metatarsal bone length and ratios suggest T-mediated effects on a variety of genes regulating phalanx growth [24,77,78]. In the present study, however, in which female rhesus monkeys exposed

**Table 3.** Mean ( $\pm$  SEM) digit length ratio in control, early (EPA) and late (LPA) prenatally androgenized female and control male rhesus monkeys.

| Digit length ratio | Control female                 | EPA                                | LPA                            | Male              |
|--------------------|--------------------------------|------------------------------------|--------------------------------|-------------------|
| <b>Left hand</b>   |                                |                                    |                                |                   |
| 2D:3D              | 0.794 $\pm$ 0.010              | 0.800 $\pm$ 0.019                  | 0.806 $\pm$ 0.015              | 0.769 $\pm$ 0.012 |
| 2D:4D              | 0.817 $\pm$ 0.010              | 0.830 $\pm$ 0.017                  | 0.828 $\pm$ 0.014              | 0.806 $\pm$ 0.012 |
| 3D:4D              | 1.032 $\pm$ 0.014              | 1.017 $\pm$ 0.017                  | 1.000 $\pm$ 0.015              | 1.049 $\pm$ 0.010 |
| <b>Right hand</b>  |                                |                                    |                                |                   |
| 2D:3D              | 0.795 $\pm$ 0.010              | 0.830 $\pm$ 0.014                  | *                              | 0.784 $\pm$ 0.011 |
| 2D:4D              | 0.817 $\pm$ 0.012              | 0.884 $\pm$ 0.014 <sup>b,c,e</sup> | 0.815 $\pm$ 0.015              | 0.799 $\pm$ 0.011 |
| 3D:4D              | 1.042 $\pm$ 0.014              | 1.060 $\pm$ 0.017                  | *                              | 1.019 $\pm$ 0.011 |
| <b>Left foot</b>   |                                |                                    |                                |                   |
| 2D:3D              | 0.747 $\pm$ 0.013              | 0.776 $\pm$ 0.018                  | *                              | 0.769 $\pm$ 0.014 |
| 2D:4D              | 0.790 $\pm$ 0.012              | 0.802 $\pm$ 0.017                  | *                              | 0.805 $\pm$ 0.014 |
| 3D:4D              | 1.053 $\pm$ 0.010              | 1.038 $\pm$ 0.016                  | 1.030 $\pm$ 0.014              | 1.044 $\pm$ 0.012 |
| <b>Right foot</b>  |                                |                                    |                                |                   |
| 2D:3D              | 0.767 $\pm$ 0.006 <sup>a</sup> | 0.778 $\pm$ 0.012 <sup>d</sup>     | 0.772 $\pm$ 0.012 <sup>f</sup> | 0.735 $\pm$ 0.008 |
| 2D:4D              | 0.811 $\pm$ 0.010 <sup>a</sup> | 0.825 $\pm$ 0.019 <sup>d</sup>     | 0.810 $\pm$ 0.015              | 0.761 $\pm$ 0.013 |
| 3D:4D              | 1.059 $\pm$ 0.008              | 1.090 $\pm$ 0.017                  | 1.050 $\pm$ 0.013              | 1.036 $\pm$ 0.011 |

\*There were only two LPA females with intact phalanges permitting calculation of 2D:3D and 3D:4D in the right hand together with 2D:3D and 2D:4D in the left foot.

<sup>a</sup>Control Female > Male, 0.01 < p < 0.05.

<sup>b</sup>EPA > Control Female, 0.001 < p < 0.01.

<sup>c</sup>EPA > LPA, 0.01 < p < 0.05.

<sup>d</sup>EPA > Male, 0.01 < p < 0.05.

<sup>e</sup>EPA > Male, p < 0.001.

<sup>f</sup>LPA > Male, 0.01 < p < 0.05.

doi:10.1371/journal.pone.0042372.t003

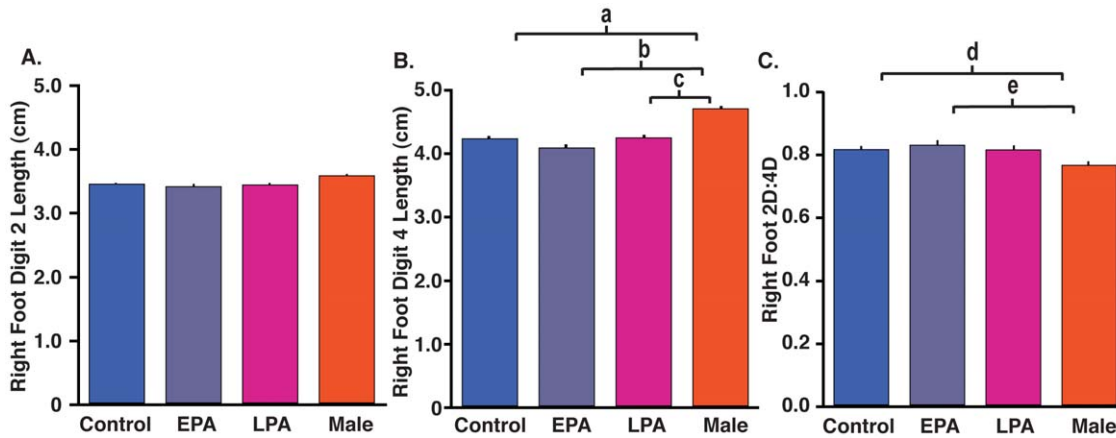

**Figure 2. Right foot (RF) toe parameters in adult control and early (EPA) and late (LPA) prenatally androgenized female and male rhesus monkeys.** (A) RF 2D finger length, (B) RF 4D finger length (<sup>a</sup>  $p < 9.0 \times 10^{-4}$ , Control Female < Male; <sup>b</sup>  $p < 0.002$ , EPA < Male; <sup>c</sup>  $p < 0.011$ , LPA < Male), and (C) RF 2D:4D ratio (<sup>d</sup>  $p < 0.02$ , Control Female > Male; <sup>e</sup>  $p < 0.04$ , EPA > Male). doi:10.1371/journal.pone.0042372.g002

to fetal T during early-to-mid, but not late, gestation exhibit elongated right hand 2D finger length and increased right hand 2D:4D ratio, T-exposed EPA females show no corresponding changes in phalanx length or joint space width, suggesting insufficient involvement of bone, cartilage and joint connective tissue in mediating elongation of right hand 2D finger length. As rhesus monkeys, typical of anthropoid primates, have obvious adipose accumulation in pronounced fingertip pads retained from fetal life [79], and EPA females exhibit differential accumulation of abdominal fat [38,80] and masculinized skin whorls in fingertip pads [79,81,82], early-to-mid fetal T exposure may direct preferential accumulation of adipose to the right hand 2D fingertip in EPA females, potentially through a mechanism similar

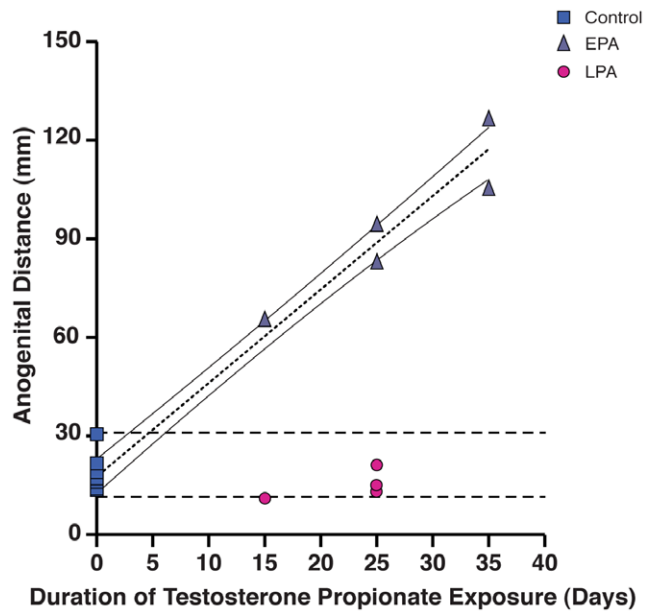

**Figure 3. Female anogenital distance positively correlates (Control and early prenatally androgenized (EPA) females only, dotted line:  $r^2 = 0.97$ ,  $p < 1.0 \times 10^{-6}$ ; 95% CI, solid lines) with duration of early-to-mid gestation fetal T exposure.** Horizontal dashed lines indicate range of control female values. doi:10.1371/journal.pone.0042372.g003

to that proposed for 2D:4D sex differences in humans [83,84]. Subtle, menstrual cycle dependent changes in 2D:4D in women certainly suggest contributions of soft tissue to female finger length [85].

With regard to a T-dependent mechanism regulating finger length, Talarovicova and colleagues [86] have shown in rats that fetal T exposure diminishes 2D length in the left forepaw and elongates 4D length in both forepaws resulting in the expected smaller 2D:4D ratios. In mice, Zheng and Cohn [25] elegantly demonstrate the relevance of both androgen receptor (AR) and estrogen receptor alpha ( $ER\alpha$ ) in regulating developing digit primordia, focusing on the hind paws. Through fetal exposure to DHT or elimination of  $ER\alpha$  expression in limbs of female mice, Zheng and Cohn [25] show that androgen excess or estrogen absence elongates 4D length and reduces 2D:4D ratio. For male mice, elimination of AR expression in limbs or fetal exposure to the androgen antagonist, flutamide, or estradiol, demonstrate that absence of androgen action or presence of estrogen excess diminishes 4D length and increases the 2D:4D ratio, and provide converse hormonal and developmental findings to those in female mice. The mouse findings reinforce the importance of fetal effects of both androgenic and estrogenic action on finger length found previously in a human study associating a higher amniotic fluid ratio of testosterone to estradiol with reduced 2D:4D finger length ratio [6]. The mouse studies also find that expression of both AR and  $ER\alpha$  are greater in 4D compared to 2D in males and females [25]. Results of the current monkey study, however, fail to emulate both rat and mouse findings with regard to right hand 2D finger length differences in EPA females, but do emulate these previous rodent results with regard to hindpaws [4,25], as male rhesus monkeys have a smaller right foot 2D:4D, achieved by an elongated 4D toe length.

Male-female monkey sexual dimorphism found in the right foot 2D:4D in the present study is surprising in two regards. Firstly, our macaque sexual dimorphism is in the opposite direction from previously recorded human toe sexual dimorphism [48,87]. Secondly, neither EPA nor LPA female monkeys show differences in right foot 2D:4D ratio or 2D toe length compared to control females. Since fingers and toes develop at the same early-to-mid gestational age [88], the smaller 2D:4D toe length ratio in only the male monkey right foot contrasts unexpectedly with an elongated 2D length and larger 2D:4D ratio in only the EPA female monkey right hand, suggesting sexually dimorphic digit responses to fetal T

exposure. In addition, the direction of sex differences in digit responses to fetal androgen or estrogen exposure, demonstrated in the earlier mouse study [25], is only emulated by male monkeys in the current study. One resolution of these digit differences between male and female monkeys could be achieved if a temporally discrete effect of fetal T (and/or its estrogenic metabolites) during mid-gestation (days 76–93 of gestation), a period of female monkey fetal development not examined by this study, was crucial for T-mediated elongation of 4D in both right hand and foot. Such gestational temporal differences in sex hormone-regulated 2D and 4D growth are possible since finger lengths reach their term length late in gestation [53].

There are, however, several additional potential explanations. Sexually dimorphic expression of AR and ER $\alpha$  may contribute to sex differences in the length of 4D [25]. Relatively more ER $\alpha$  expression in females [25] and local aromatization of exogenous T shortens 4D and relatively more AR in males [25] enables testicular fetal T to stimulate a longer 4D. In such a scenario, increased TP-injected monkey dam conjugation of estrogens due to placental aromatization of exogenous T in EPA pregnancies [56], combined with placental transport of sulfated estrogens and high expression of sulfatase in fetal digits [89], may increase 4D exposure to local estrogenic action and thus diminish T-mediated 4D elongation in EPA females, alone. Genetically-determined effects, independent of androgenic (or estrogenic) action, possibly involving interactions between testis-determining *SRY* and genes regulating finger length, such as *Sox9* the downstream target of *SRY* [25], and the interaction of *Sox9* with TGF-beta regulation of fetal digit extra-cellular matrix [90], may be crucial for male-like digit responses to the fetal steroid hormone environment. Regarding TGF-beta signaling in fetal digit development [90], the epigenetic profile of visceral adipose from both infant and adult EPA female monkeys includes altered DNA methylation of genes involving TGF-beta signaling [41]. Whether one or more of these potential mechanisms operate through combined effects on phalanx length, joint space width and fingertip adipose deposition remains to be determined.

The current pilot monkey study, however, does not differentiate between these and other possibilities, but does identify difficulty in employing adult 2D:4D digit ratios as reliable, generic biomarkers for fetal T excess. Origins of digit length ratios are not as straightforward as initially proposed by Manning and colleagues [3,4,61,91]. Our monkey results may help to explain why associations of 2D:4D with developmental outcomes in humans are more pronounced than the magnitude of sex differences in 2D:4D [62,92], as well as the substantial variations in 2D:4D between different human populations [58,62]. As genetically-determined sex of an individual [93], together with gestational stage at fetal T exposure (from exogenous or endogenous sources) and its duration, may all influence how 2D:4D manifests after birth, our monkey results call into question the widespread use of 2D:4D as an associated fetal T biomarker implicating gestational T exposure with pathological [3,10,11,18,19] or other outcomes [3,59,61,62]. Until *in utero*, hormonally-regulated mechanisms determining finger lengths in both sexes are elucidated in primates, including humans, our results indicate the potentially misleading nature of using adult 2D:4D, alone, as a biomarker for fetal T exposure.

### Relevance of 2D:4D to PCOS

Our pilot monkey study also permits re-interpretation of recent 2D:4D findings in PCOS women and one previous conclusion that PCOS is not associated with prior gestational T exposure [94,95]. In female animal models, while gestational T exposure reliably

induces PCOS-like traits [34,36,96–98], the origins of PCOS in women are still unknown [35]. PCOS is a prevalent hyperandrogenic disorder of reproduction and metabolism in reproductive aged women [99–101]. Due to the difficulty of measuring human fetal T levels during gestation [19,102], most cited evidence for fetal T exposure, such as 2D:4D, is indirect. The use of adult 2D:4D, however, as evidence for T exposure during gestation in women with PCOS has generated mixed results. Cattrall and colleagues [17] measured 2D:4D in a group of 17 women with classic PCOS (selected by NIH criteria [103]) and discovered a small, but significant, decrease towards a male-like ratio in both left and right hands. Lujan and colleagues [94,95], however, showed that women with a variety of PCOS phenotypes (Rotterdam criteria [46]) do not demonstrate a more male-like 2D:4D in either left or right hands in any PCOS phenotype. Interestingly, however, PCOS women in Lujan's studies [94,95] do exhibit a hyper-feminized 2D:4D ratio because of relatively lengthy 2D compared to 4D finger lengths in both left and right hands. The greatest relative elongation of 2D finger length occurs in the most hyperandrogenic PCOS women, resulting in positive rather than the expected negative correlations between 2D:4D and basal T, free androgen index and hirsutism score. 2D:4D, however, is regulated mostly by the fetal and not adult hormone environment [7,49]. Thus, if 2D:4D is determined similarly in PCOS women as in EPA, PCOS-like female rhesus monkeys, such positive correlations between adult 2D:4D and parameters of adult hyperandrogenism suggest that the degree of androgen excess and elongation of 2D:4D in PCOS may reflect the degree and duration of fetal T exposure during early-to-mid gestation.

Direct evidence for a fetal T contribution to developmental origins of PCOS in humans, however, has been restricted to assessment of umbilical cord blood hormone levels from term births. Daughters born to women with PCOS, and at increased risk of PCOS in adulthood [104], have elevated, male-like T levels in umbilical vein blood at term [105]. In a separate study, however, PCOS daughters had reduced levels of androstenedione, an androgenic precursor to T, in mixed cord blood [106]. The late term gestational environment of PCOS daughters may thus be abnormal in terms of circulating androgens, but inconsistently so. Mixed cord blood levels of T are also not elevated in girls who were subsequently diagnosed with PCOS in adolescence [107]; however, the overly-prevalent adolescent diagnosis of PCOS (28%) in this Australian population is confounded by age-appropriate anovulation and multifollicular ovaries [108,109]. Such term assessments, however, may be too removed from transient, mid-gestational ovarian androgen biosynthesis [110] and fetal male-like elevations in circulating T [102] to accurately identify PCOS risk. Accompanying elevations in maternal [111] or fetal [112] insulin during hyperglycemic gestations in PCOS women [113] and PA monkeys [112] may enhance fetal ovarian androgenicity [114]. Until advances in technology permit safe and accurate measurement of human fetal blood concentrations, or identification of a reliable postnatal biomarker of early-to-mid-gestational androgen exposure, understanding fetal T contributions to human 2D:4D and to the origins of PCOS will remain elusive.

## Materials and Methods

### Ethics Statement

The Institutional Animal Care and Use Committee of the Graduate School of the University of Wisconsin-Madison approved all procedures used in the study, and the care and housing of the monkeys was in accordance with the recommen-

datations of the Guide for the Care and Use of Laboratory Animals and Animal Welfare Act with its subsequent amendments.

## Animals

The 33 female and 9 male adult rhesus monkeys (*Macaca mulatta*) used in this study were maintained at WNPRC, according to standard protocol as previously described [30,40]. Age, weight and body mass index (BMI; body weight (kg)/crown-rump length (m<sup>2</sup>) [115]) of female groups were comparable, whereas male body weight and BMI showed species-typical sexual dimorphism (Table 1). Somatometric measurements were obtained from each animal while anesthetized with ketamine HCl (7 mg/kg, intramuscular (i.m.) injection) and xylazine (Rompun; 0.6 mg/kg, i.m.).

Fourteen of the 33 female monkeys were exposed to fetal testosterone excess by subcutaneous (s.c.) injection of their dams with 10 mg testosterone propionate (TP). Dams of seven PA females received daily TP injections starting on gestational days 40–44 for 15–35 consecutive days (early-to-mid gestation, E). The other seven dams received injections of TP starting on gestational days 94–115 for 15–25 consecutive days (late gestation, L). We could only study 14 of the 23 previously described PA monkeys [37] as nine of the PA females had died of natural causes. The other 19 control female monkeys, and all males, in this study were not exposed to exogenous testosterone excess *in utero*, and were selected from monkeys not otherwise manipulated during gestation by other investigators or colony management at the WNPRC.

In some of the female monkeys employed in this study, somatometric measures, basal testosterone, menstrual cycle duration and ovarian morphology were previously reported in a variety of earlier studies, but are included here to provide appropriate context for analyses of the lengths of digits (fingers and toes) as well as phalanges (bones of the fingers and toes) and joint space width [34–37,40,116–118]. Blood samples providing serum for hormone analyses were obtained from animals trained to use a tabletop restraint without anesthesia [116]. Ovarian morphology was visualized during abdominal laparoscopy [119] while the animals were sedated with Ketamine HCl (10 mg/kg, i.m.).

## Parameters relevant to PCOS-like traits

**Menstrual cycle assessment.** Each female monkey underwent saphenous venipuncture three times weekly between 06:00 and 09:00 h while in a familiar tabletop restraint without anesthesia, and the resultant serum was assayed for progesterone for ~2–6 month intervals [34–37,40,116–118]. Since menstrual discharge was not usually observed in approximately one-third of ovulatory EPA female rhesus monkeys [116], both a decline in serum progesterone values and the first day of menstruation were used to determine menstrual cycle phase onset and duration. The day that serum progesterone levels exceeded 0.4 ng/ml was designated as the first day of a luteal phase, while the day that serum progesterone levels declined below 0.4 ng/ml was defined as the onset of the follicular phase [116]. Ovulatory menstrual cycles were identified as those with two serum progesterone levels above 1 ng/ml within 15 days before menses or serum progesterone falling below 0.4 ng/ml [30,116].

**Hormone assays.** Circulating progesterone and T determinations were undertaken by enzymeimmunoassay in the WNPRC/Institute of Clinical Translational Research (ICTR) Hormone Assay Services Laboratory [117,120]. T measurements were performed following diethyl ether extraction of serum and solvent fraction separation by celite chromatography. Intra- and inter-assay CVs for quality control preparation (QC) values were, respectively, progesterone, 3.9% and 8.9%; T, 3.5% and 14.0%.

**Ovarian morphology.** During laparoscopic assessment of ovarian dimensions [121,122] while the animals were sedated with Ketamine HCl (10 mg/kg, i.m.), photographic images were taken of trans-illuminated ovaries [119] at their largest diameter during the early follicular phase (menstrual cycle days 1–5) or an anovulatory interval. Ovarian images with >10, ~1–3 mm diameter follicles were scored as polyfollicular (Table 1), a criterion modified from the prevailing ultrasonographic determination of polycystic ovaries in women [45] before the Rotterdam consensus [46].

## Somatometrics

Somatometric measurements were performed immediately after x-rays of hands and feet, or after DXA scans (for an unrelated study), as previously validated for rhesus monkeys [123]. Each animal was anesthetized with ketamine HCl (7 mg/kg, i.m.) and xylazine (Rompun; 0.6 mg/kg, i.m.) and was assessed for body weight, crown-rump length, digit length and anogenital distance.

**Digit Lengths.** With the animal in left lateral recumbency, digit measurements were taken of the right hand and foot. The animal was then moved to right lateral recumbency and the left hand and foot digits were measured. Digit lengths were measured on the ventral surface of the hands and feet, using a Lange digitized caliper measuring to the nearest  $\pm 0.1$  mm, from the middle of the proximal skin crease at the base of the digit to the mid-point at the tip of the digit [3,4,58]. Each digit was extended and placed flat on a tabletop, dorsal side facing down, during measurement to ensure the most accurate digit measurement possible, while avoiding the confounding factor of soft tissue in the finger tips distorting the length measurement when pressed ventrally against a glass surface to be photocopied or scanned [51]. The same experimenter repeated the digit measurement three times for all monkeys, taking the average for each digit. Because of age and social housing, several digit measures were omitted due to either visibly compromised digits (i.e., incomplete, damaged, missing, bent) or x-ray determined damage in digit phalanges (i.e., arthritic growth, dislocated bones, improperly healed fractures, missing bones, broken bones). Interclass correlation coefficient (ICC) was used to assess reliability of mean finger and toe length measurement (average length ICC with absolute-agreement definition) [124] and ranged from 0.95–0.98.

**Anogenital distance.** This measure was performed with the animal in right lateral recumbency and using a cloth tape measure to the nearest  $\pm 0.1$  cm. One end of the tape measure was placed above the center of the anus while the length measurement above the center of the urethra was recorded.

**Phalanx measurements.** Radiographs, using standard techniques, were taken of hands and feet of all monkeys with digits fully extended and flattened against the radiographic plate. Three radiographs of the right foot in control females were omitted from analyses because they did not permit accurate phalanx measurements when viewed under  $\times 2$  magnification on a radiograph light box. A single operator measured each phalanx (proximal, P1; intermediate, P2; distal, P3) three different times to obtain the average length used in analyses while blind to female fetal history. Phalanx length was obtained using a Fisherbrand Traceable Electronic Digital Caliper accurate to  $\pm 0.01$  mm from the mid-points of the proximal and distal ends of each phalanx [2]. Emphasis was placed on measuring the straight alignment of the distal and proximal ends of the shaft rather than its vertical alignment [78]. The same observer, after ~2–60 months, used the same methodology to re-measure phalanges in 76.2% (32/42) of radiographs, without regard to previous measurements, in order to assess reliability of phalanx measurements by calculating intra-



observer reliability (IOR) between original and repeated assessments [57,58]. Intra-observer correlations ranged from 0.95–0.97.

Due to the mid-to-late reproductive years of the monkeys used [36,37], an independent observer scored all the phalanges for arthritis while blind to animal group. Digits that were obviously arthritic, damaged, missing, broken, incomplete or bent were omitted from analyses.

**Cartilage Measurements.** The joint space width (JSW) of the metacarpophalangeal (MCP), proximal interphalangeal (PIP) and distal interphalangeal (DIP) joints in the second digit of the right hand were measured from the already captured radiographs using a Fisherbrand Traceable Electronic Digital Caliper, accurate to  $\pm 0.01$  mm. Using the previously described method of measuring JSW by Angwin and colleagues [125], values were taken from three different positions along the JSW: two were on the outside of the second digit – lateral and medial to the middle finger, and one in the center of the JSW of the second digit [125]. A single operator measured each JSW three different times to obtain the average length used in analyses while blind to animal group. The same observer, after 6 months, used the same methodology to re-measure JSW in 31% (13/42) of radiographs, without regard to previous measurements. Intra-observer correlations ranged from 0.65–0.71.

## Statistical Analysis

Variables were compared by one-way ANOVA using fetal T exposure as the main factor. When significant ( $p < 0.05$ ), post-hoc analysis was performed using Tukey's test (Systat 12, Chicago, IL). Least-mean square regression was employed to examine parameter association. As a large number of ANOVAs were performed on phalanx and joint distance measures, the standard criterion for statistical significance ( $p < 0.05$ ) may have been exceeded by chance. It is thus important that statistical assessments of phalanx and joint space parameters be interpreted in relation to appropriate accompanying effect size ( $\eta^2_p$ ; [43,44]), particularly medium ( $\sim 0.5$ ) to large ( $\sim 0.8$ ) effect sizes [42], as employed by

## References

- Ecker A (1875) Some remarks about a varying character in the hands of humans. *Archiv fur Anthropol* 8: 68–74.
- McIntyre MH, Cohn BA, Ellison PT (2006) Sex dimorphism in digital formulae of children. *Am J Phys Anthropol* 129: 143–150.
- Manning JT, Scutt D, Wilson D, Lewis-Jones DI (1998) The ratio of 2nd to 4th digit length: a predictor of sperm numbers and concentrations of testosterone, luteinizing hormone and oestrogen. *Hum Reprod* 13: 3000–3004.
- Manning JT, Callow M, Bundred PE (2003) Finger and toe ratios in humans and mice: implications for the aetiology of diseases influenced by HOX genes. *Med Hypoth* 60: 340–343.
- Brown WM, Hines M, Fane BA, Breedlove SM (2002) Masculinized finger length patterns in human males and females with congenital adrenal hyperplasia. *Horm Behav* 42: 380–386.
- Lutchmaya S, Baron-Cohen S, Raggatt P, Knickmeyer R, Manning JT (2004) 2nd to 4th digit ratios, fetal testosterone and estradiol. *Early Hum Dev* 77: 23–28.
- Muller DC, Giles GG, Bassett J, Morris HA, Manning JT, et al. (2011) Second to fourth digit ratio (2D:4D) and concentrations of circulating sex hormones in adulthood. *Reprod Biol Endocrinol* 9: 57.
- Auger J, Eustache F (2011) Second to fourth digit ratios, male genital development and reproductive health: a clinical study among fertile men and testis cancer patients. *Int J Androl* 34: e49–58.
- Nicolás Hopp R, Jorge J (2011) Right hand digit ratio (2D:4D) is associated with oral cancer. *Am J Hum Biol* 23: 423–425.
- Manning JT, Baron-Cohen S, Wheelwright S, Sanders G (2001) The 2nd to 4th digit ratio and autism. *Dev Med Child Neurol* 43: 160–164.
- Martel MM, Gobrogge KL, Breedlove SM, Nigg JT (2008) Masculinized finger-length ratios of boys, but not girls, are associated with attention-deficit/hyperactivity disorder. *Behav Neurosci* 122: 273–281.
- Smith AR, Hawkeswood SE, Joiner TE (2010) The measure of a man: associations between digit ratio and disordered eating in males. *Int J Eat Disord* 43: 543–548.
- Manning JT, Leinster S (2001) 2nd to 4th digit ratio and age at presentation of breast cancer. *The Breast* 10: 355–357.
- Brabin L, Roberts SA, Farzaneh F, Fairbrother E, Kitchener HC (2008) The second to fourth digit ratio (2D:4D) in women with and without human papillomavirus and cervical dysplasia. *Am J Hum Biol* 20: 337–341.
- Noipayak P (2009) The ratio of 2nd and 4th digit length in autistic children. *J Med Assoc Thai* 92: 1040–1045.
- De Bruin EI, De Nijs PF, Verheij F, Verhagen DH, Ferdinand RF (2009) Autistic features in girls from a psychiatric sample are strongly associated with a low 2D:4D ratio. *Autism* 13: 511–521.
- Catrrall FR, Vollenhoven BJ, Weston GC (2005) Anatomical evidence for in utero androgen exposure in women with polycystic ovary syndrome. *Fertil Steril* 84: 1689–1692.
- Breedlove SM (2010) Minireview: Organizational hypothesis: instances of the fingerpost. *Endocrinology* 151: 4116–4122.
- Berenbaum SA, Bryk KK, Nowak N, Quigley CA, Moffat S (2009) Fingers as a marker of prenatal androgen exposure. *Endocrinology* 150: 5119–5124.
- New MI, Wilson RC (1999) Steroid disorders in children: congenital adrenal hyperplasia and apparent mineralocorticoid excess. *Proc Natl Acad Sci U S A* 96: 12790–12797.
- Witchel SF, Azziz R (2011) Congenital adrenal hyperplasia. *J Pediatr Adolesc Gynecol* 24: 116–126.
- Speiser PW, Azziz R, Baskin LS, Ghizzoni L, Hensle TW et al. (2010) Congenital adrenal hyperplasia due to steroid 21-hydroxylase deficiency: an Endocrine Society clinical practice guideline. *J Clin Endocrinol Metab* 95: 4133–4160.
- Buck JJ, Williams RM, Hughes IA, Acerini CL (2003) In-utero androgen exposure and 2nd to 4th digit length ratio-comparisons between healthy controls and females with classical congenital adrenal hyperplasia. *Hum Reprod* 18: 976–979.
- Nelson E, Voracek M (2010) Heritability of digit ratio (2D:4D) in rhesus macaques (*Macaca mulatta*). *Primates* 51: 1–5.

McFadden and Bracht [126] in examining relative lengths of metacarpals and metatarsals in Great Apes. Effect sizes for all parameters are provided in Table S3.

## Supporting Information

**Table S1 Mean ( $\pm$  SEM) phalanx lengths in control, early (EPA) and late (LPA) prenatally androgenized female and control male rhesus monkeys.**

(DOCX)

**Table S2 Mean ( $\pm$  SEM) phalanx length ratios in control, early (EPA) and late (LPA) prenatally androgenized female and control male rhesus monkeys.**

(DOCX)

**Table S3 Effect size ( $\eta^2_p$ ) [42] of digit length averages, phalanx length averages, digit ratios, phalanx length ratios and biological statistics in control, early (EPA) and late (LPA) prenatally androgenized female and control male rhesus monkeys.** Categories of effect size: small: 0.20; medium: 0.50; large: 0.80 [42].

(DOCX)

## Acknowledgments

The authors thank the following personnel at the WNPRC: A.K. Edwards for her technical assistance; D. Wade, S. Maves, S.L. Knowles, M. Shotsko and M. Brown for assistance with animal procedures; S.G. Eisele and the animal care staff of the WNPRC for maintenance of the animals and computerized records; K. Brunner DVM and C. Cruzen DVM for veterinary care.

## Author Contributions

Conceived and designed the experiments: DHA. Performed the experiments: ADA RT DHA. Analyzed the data: ADA RJC DHA. Contributed reagents/materials/analysis tools: RJC. Wrote the paper: ADA DHA. Critical revision of the article: ADA RJC RT DAD DHA.

25. Zheng Z, Cohn MJ (2011) Developmental basis of sexually dimorphic digit ratios. *Proc Natl Acad Sci U S A* 108: 16289–16294.
26. Abbott DH, Zhou R, Bird IM, Dumesic DA, Conley AJ (2008) Fetal programming of adrenal androgen excess: lessons from a nonhuman primate model of polycystic ovary syndrome. *Endocr Dev* 13: 145–158.
27. Goy RW, Resko JA (1972) Gonadal hormones and behavior of normal and pseudohermaphroditic nonhuman female primates. *Recent Prog Horm Res* 28: 707–733.
28. Goy RW, Bercovitch FB, McBrain MC (1988) Behavioral masculinization is independent of genital masculinization in prenatally androgenized female rhesus macaques. *Horm Behav* 22: 552–571.
29. Goy RW, Uno H, Sholl SA (1988) Physiological and anatomical consequences of prenatal exposure to androgens in female rhesus. In: Mori T, Nagasawa H, editors. *Toxicity of hormones in perinatal life*. Boca Raton: CRC Press, Inc. pp. 127–142.
30. Goy RW, Robinson JA (1982) Prenatal exposure of rhesus monkeys to patent androgens: morphological, behavioral, and physiological consequences. In: Hunt VR, Smith MK, Worth D, eds. *Banbury Report II: Environmental factors in human growth and development*. Cold Spring Harbor: Cold Spring Harbor Laboratory. pp 355–378.
31. Thornton J, Zehr JL, Loose MD (2009) Effects of prenatal androgens on rhesus monkeys: a model system to explore the organizational hypothesis in primates. *Horm Behav* 55: 633–645.
32. Goy RW, Wolf JE, Eisele SG (1976) Experimental pseudohermaphroditism in rhesus monkeys: anatomical and psychological characteristics. In: 13<sup>th</sup> ed. Musaph H, Money J, editor. *Handbook of sexology*. Amsterdam: Elsevier/North-Holland Biomedical Press. pp 139–156.
33. Herman RA, Jones B, Mann DR, Wallen K (2000) Timing of prenatal androgen exposure: anatomical and endocrine effects on juvenile male and female rhesus monkeys. *Horm Behav* 8: 52–66.
34. Abbott DH, Dumesic DA, Eisner JR, Colman RJ, Kemnitz JW (1998) Insights into the development of polycystic ovary syndrome (PCOS) from studies of prenatally androgenized female rhesus monkeys. *Trends Endocrinol Metab* 9: 62–67.
35. Abbott DH, Dumesic DA, Franks S (2002) Developmental origin of polycystic ovary syndrome - a hypothesis. *J Endocrinol* 174: 1–5.
36. Abbott DH, Barnett DK, Bruns CM, Dumesic DA (2005) Androgen excess fetal programming of female reproduction: a developmental aetiology for polycystic ovary syndrome? *Hum Reprod Update* 11: 357–374.
37. Abbott DH, Tarantal AF, Dumesic DA (2009) Fetal, infant, adolescent and adult phenotypes of polycystic ovary syndrome in prenatally androgenized female rhesus monkeys. *Am J Primatol* 71: 776–784.
38. Bruns CM, Baum ST, Colman RJ, Dumesic DA, Eisner JR et al. (2007) Prenatal androgen excess negatively impacts body fat distribution in a nonhuman primate model of polycystic ovary syndrome. *Int J Obes* 31: 1579–1585.
39. Dumesic DA, Abbott DH, Padmanabhan V (2007) Polycystic ovary syndrome and its developmental origins. *Rev Endocr Metab Disord* 8: 127–141.
40. Eisner JR, Dumesic DA, Kemnitz JW, Abbott DH (2000) Timing of prenatal androgen excess determines differential impairment in insulin secretion and action in adult female rhesus monkeys. *J Clin Endocrinol Metab* 85: 1206–1210.
41. Xu N, Kwon S, Abbott DH, Geller DH, Dumesic DA, et al. (2011) Epigenetic mechanism underlying the development of polycystic ovary syndrome (PCOS)-like phenotypes in prenatally androgenized rhesus monkeys. *PLoS ONE* 6: e27286.
42. Cohen J (1972) A power primer. *Psychol Bull* 112: 155–159.
43. Olejnik S, Algina J (2003) Generalized eta and omega squared statistics: measures of effect size for some common research designs. *Psychol Methods* 8: 434–447.
44. Bakeman R (2005) Recommended effect size statistics for repeated measures designs. *Behav Res Methods* 37: 379–384.
45. Adams J, Polson DW, Franks S (1986) Prevalence of polycystic ovaries in women with anovulation and idiopathic hirsutism. *Br Med J (Clin Res Ed)* 293: 355–359.
46. The Rotterdam ESHRE/ASRM-sponsored PCOS Consensus Workshop Group (2004) Revised 2003 consensus on diagnostic criteria and long-term health risks related to polycystic ovary syndrome (PCOS). *Hum Reprod* 19: 41–47.
47. Manning JT, Fink B, Neave N, Szved A (2006) The second to fourth digit ratio and asymmetry. *Ann Hum Biol* 33: 480–492.
48. McFadden D, Shubel E (2002) Relative lengths of fingers and toes in human males and females. *Horm Behav* 42: 492–500.
49. Hönckopp J, Bartholdt L, Beier L, Liebert A (2007) Second to fourth digit length ratio (2D:4D) and adult sex hormone levels: new data and a meta-analytic review. *Psychoneuroendocrinology* 32: 313–321.
50. Voracek M, Dressler SG (2009) Brief communication: Familial resemblance in digit ratio (2D:4D). *Am J Phys Anthropol* 140: 376–380.
51. Hönckopp J, Watson S (2010) Meta-analysis of digit ratio 2D:4D shows greater sex difference in the right hand. *Am J Hum Biol* 22: 619–630.
52. Garn SM, Burdi AR, Babler WJ, Stinson S (1975) Early prenatal attainment of adult metacarpal-phalangeal rankings and proportions. *Am J Phys Anthropol* 43: 327–332.
53. Malas MA, Dogan S, Evcil EH, Desdicioglu K (2006) Fetal development of the hand, digits and digit ratio (2D:4D). *Early Hum Dev* 82: 469–475.
54. Galis F, Ten Broek CM, Van Dongen S, Wijnaendts LC (2010) Sexual dimorphism in the prenatal digit ratio (2D:4D). *Arch Sex Behav* 39: 57–62.
55. Resko JA, Buhl AE, Phoenix CH (1987) Treatment of pregnant rhesus macaques with testosterone propionate: observations on its fate in the fetus. *Biol Reprod* 37: 1185–1191.
56. Abbott DH, Barnett DK, Levine JE, Padmanabhan V, Dumesic DA, et al. (2008) Endocrine antecedents of polycystic ovary syndrome in fetal and infant prenatally androgenized female rhesus monkeys. *Biol Reprod* 79: 154–163.
57. McIntyre MH, Ellison PT, Lieberman DE, Demerath E, Towne B (2005) The development of sex difference in digital formula from infancy in the Fels Longitudinal Study. *Proc R Soc B* 272: 1473–1479.
58. McIntyre MH, Herrmann E, Wobber V, Halbax M, Mohamba C, et al. (2009) Bonobos have a more human-like second-to-fourth finger length ratio (2D:4D) than chimpanzees: a hypothesized indication of lower prenatal androgens. *J Hum Evol* 56: 361–365.
59. McIntyre M (2006) The use of digit ratios as markers for perinatal androgen action. *Reprod Biol Endocrinol* 4: 10.
60. Fowler PA, Bhattacharya S, Flannigan S, Drake AJ, O'Shaughnessy PJ (2011) Maternal cigarette smoking and effects on androgen action in male offspring: unexpected effects on second-trimester anogenital distance. *J Clin Endocrinol Metab* 96: E1502–1506.
61. Manning JT (2002) Digit ratio: A pointer to fertility, behavior and health. New Brunswick: Rutgers University Press.
62. Voracek M, Reimer B, Ertl C, Dressler SG (2006) Digit ratio (2D:4D), lateral preferences, and performance in fencing. *Percept Mot Skills* 103: 427–446.
63. Chura LR, Lombardo MV, Ashwin E, Auyeung B, Chakrabarti B, et al. (2010) Organizational effects of fetal testosterone on human corpus callosum size and asymmetry. *Psychoneuroendocrinology* 35: 122–132.
64. Cohen-Bendahan CC, van de Beek C, Berenbaum SA (2005) Prenatal sex hormone effects on child and adult sex-typed behavior: methods and findings. *Neurosci Biobehav Rev* 29: 353–384.
65. Roney JR, Whitham JC, Leoni M, Bellem A, Wielebnowski N, et al. (2004) Relative digit lengths and testosterone levels in Guinea baboons. *Horm Behav* 45: 285–290.
66. Hill R, Simpson B, Manning J, Kilduff L (2012) Right-left digit ratio (2D:4D) and maximal oxygen uptake. *J Sports Sci* 30: 129–134.
67. Manning JT, Taylor RP (2001) Second to fourth digit ratio and male ability in sport: implications for sexual selection in humans. *Evol Hum Behav* 22: 61–69.
68. Bescós R, Esteve M, Porta J, Mateu M, Irurtia A, et al. (2009) Prenatal programming of sporting success: Associations of digit ratio (2D:4D), a putative marker for prenatal androgen action, with world rankings in female fencers. *J Sports Sci* 27: 625–632.
69. Stoyanov Z, Marinov M, Pashalieva I (2009) Finger length ratio (2D:4D) in left- and right-handed males. *Int J Neurosci* 119: 1006–1013.
70. Manning JT, Peters M (2009) Digit ratio (2D:4D) and hand preference for writing in the BBC Internet Study. *Laterality* 14: 528–540.
71. Beaton AA, Rudling N, Kissling C, Taurines R, Thome J (2011) Digit ratio (2D:4D), salivary testosterone, and handedness. *Laterality* 16: 136–155.
72. Voracek M, Pum U, Dressler SG (2010) Investigating digit ratio (2D:4D) in a highly male-dominated occupation: the case of firefighters. *Scand J Psychol* 51: 146–156.
73. Gillam L, McDonald R, Ebling FJ, Mayhew TM (2008) Human 2D (index) and 4D (ring) finger lengths and ratios: cross-sectional data on linear growth patterns, sexual dimorphism and lateral asymmetry from 4 to 60 years of age. *J Anat* 213: 325–335.
74. Boets B, De Smedt B, Wouters J, Lemay K, Ghesquière P (2007) No relation between 2D : 4D fetal testosterone marker and dyslexia. *Neuroreport* 18: 1487–1491.
75. Bourne VJ, Gray DL (2009) Hormone exposure and functional lateralisation: Examining the contributions of prenatal and later life hormonal exposure. *Psychoneuroendocrinology* 34: 1214–1221.
76. Nelson E, Shultz S (2010) Finger length ratios (2D:4D) in anthropoids implicate reduced prenatal androgens in social bonding. *Am J Phys Anthropol* 141: 395–405.
77. McFadden D, Lochlin JC, Breedlove SM, Lippa RA, Manning JT, et al. (2005) A reanalysis of five studies on sexual orientation and the relative length of the 2<sup>nd</sup> and 4<sup>th</sup> fingers (the 2D:4D ratio). *Arch Sex Behav* 34: 341–356.
78. McFadden D, Bracht MS (2009) Sex and race differences in the relative lengths of metacarpals and metatarsals in human skeletons. *Early Hum Dev* 85: 117–124.
79. Jamison CS, Jamison PL, Meier RJ (1994) Effect of prenatal testosterone administration on palmar dermatoglyphic intercore ridge counts of rhesus monkeys (*Macaca mulatta*). *Am J Phys Anthropol* 94: 409–419.
80. Eisner JR, Dumesic DA, Kemnitz JW, Colman RJ, Abbott DH (2003) Increased adiposity in female rhesus monkeys exposed to androgen excess during early gestation. *Obes Res* 11: 279–286.
81. Meier RJ, Sorenson Jamison C, Jamison PL (1993) Prenatal testosterone effect on dermatoglyphic development in rhesus macaques. *Folia Primatol (Basel)* 60: 164–168.
82. Jamison CS, Meier RJ, Campbell BC (1993) Dermatoglyphic asymmetry and testosterone levels in normal males. *Am J Phys Anthropol* 90: 185–198.

83. Wallen K (2009) Does finger fat produce sex differences in second to fourth digit ratios? *Endocrinology* 150: 4819–4822.
84. Vehmas T, Solovieva S, Leino-Arjas P (2006) Radiographic 2D:4D index in females: no relation to anthropometric, behavioural, nutritional, health-related, occupational or fertility variables. *J Negat Results Biomed* 5: 12.
85. Mayhew TM, Gillam L, McDonald R, Ebling FJP (2007) Human 2D (index) and 4D (ring) digit lengths: their variation and relationships during the menstrual cycle. *J Anat* 211: 630–638.
86. Talarovicová A, Krsková L, Blazeková J (2009) Testosterone enhancement during pregnancy influences the 2D:4D ratio and open field motor activity of rat siblings in adulthood. *Horm Behav* 55: 235–239.
87. Voracek M, Dressler SG (2010) Relationships of toe-length ratios to finger-length ratios, foot preference, and wearing of toe rings. *Percept Mot Skills* 110: 33–47.
88. Stricker S, Mundlos S (2011) Mechanisms of digit formation: Human malformation syndromes tell the story. *Dev Dyn* 240: 990–1004.
89. Dawson PA (2011) Sulfate in fetal development. *Semin Cell Dev Biol* 22: 653–659.
90. Lorda-Diez CI, Montero JA, Díaz-Mendoza MJ, García-Porrero JA, Hurlé JM (2011) Defining the earliest transcriptional steps of chondrogenic progenitor specification during the formation of the digits in the embryonic limb. *PLoS ONE* 6: e24546.
91. Manning JT (2011) Resolving the role of prenatal sex steroids in the development of digit ratio. *Proc Natl Acad Sci U S A* 108:16143–16144.
92. Dressler SG, Voracek M (2011) No association between two candidate markers of prenatal sex hormones: digit ratios (2D:4D and other) and finger-ridge counts. *Dev Psychobiol* 53: 69–78.
93. Chen X, McClusky R, Chen J, Beaven SW, Tontonoz P, et al. (2012) The number of X chromosomes causes sex differences in adiposity in mice. *PLoS Genet* 8: e1002709.
94. Lujan ME, Bloski TG, Chizen DR, Lehotay DC, Pierson RA (2010) Digit ratios do not serve as anatomical evidence of prenatal androgen exposure in clinical phenotypes of polycystic ovary syndrome. *Hum Reprod* 25: 204–211.
95. Lujan ME, Podolski AJ, Chizen DR, Lehotay DC, Pierson RA (2010) Digit ratios by computer-assisted analysis confirm lack of anatomical evidence of prenatal androgen exposure in clinical phenotypes of polycystic ovary syndrome. *Reprod Biol Endocrinol* 8: 156.
96. West C, Foster DL, Evans NP, Robinson J, Padmanabhan V (2001) Intra-follicular activin availability is altered in prenatally-androgenized lambs. *Mol Cell Endocrinol* 185: 51–59.
97. Sullivan SD, Moenter SM (2004) Prenatal androgens alter GABAergic drive to gonadotropin-releasing hormone neurons: implications for a common fertility disorder. *Proc Natl Acad Sci U S A* 101: 7129–7134.
98. Foecking EM, Szabo M, Schwartz NB, Levine JE (2005) Neuroendocrine consequences of prenatal androgen exposure in the female rat: absence of luteinizing hormone surges, suppression of progesterone receptor gene expression, and acceleration of the gonadotropin-releasing hormone pulse generator. *Biol Reprod* 72: 1475–1483.
99. Alpañés M, Fernández-Dúran E, Escobar-Morreale (2012) Androgens and polycystic ovary syndrome. *Expert Rev Endocrinol Metab* 7: 91–102.
100. Azziz R, Carmina E, Dewailly D, Diamanti-Kandarakis E, Escobar-Morreale HF, et al. (2006) Positions statement: criteria for defining polycystic ovary syndrome as a predominantly hyperandrogenic syndrome: an Androgen Excess Society guideline. *J Clin Endocrinol Metab* 91: 4237–4245.
101. Azziz R, Carmina E, Dewailly D, Diamanti-Kandarakis E, Escobar-Morreale HF, et al. (2009) The Androgen Excess and PCOS Society criteria for the polycystic ovary syndrome: the complete task force report. *Fertil Steril* 91: 456–488.
102. Beck-Peccoz P, Padmanabhan V, Baggiani AM, Cortelazzi D, Buscaglia M, et al. (1991) Maturation of hypothalamic-pituitary-gonadal function in normal human fetuses: circulating levels of gonadotropins, their common alpha-subunit and free testosterone, and discrepancy between immunological and biological activities of circulating follicle-stimulating hormone. *J Clin Endocrinol Metab* 73:525–532.
103. Zawadzki JK, Dunaif A (1992) Diagnostic criteria for polycystic ovary syndrome: Towards a rational approach. In: Dunaif A, Givens JR, Haseltine FP, Merriam GR, eds. *Polycystic ovary syndrome*. Boston: Blackwell; pp. 377–384.
104. Sir-Petermann T, Codner E, Pérez V, Echiburú B, Maliqueo M, et al. (2009) Metabolic and reproductive features before and during puberty in daughters of women with polycystic ovary syndrome. *J Clin Endocrinol Metab* 94: 1923–1930.
105. Barry JA, Kay AR, Navaratnarajah R, Iqbal S, Bamfo JE, et al. (2010) Umbilical vein testosterone in female infants born to mothers with polycystic ovary syndrome is elevated to male levels. *J Obstet Gynaecol* 30: 444–446.
106. Anderson H, Fogel N, Grebe SK, Singh RJ, Taylor RL, et al. (2010) Infants of women with polycystic ovary syndrome have lower cord blood androstenedione and estradiol levels. *J Clin Endocrinol Metab* 95: 2180–2186.
107. Hickey M, Sloboda DM, Atkinson HC, Doherty DA, Franks S, et al. (2009) The relationship between maternal and umbilical cord androgen levels and polycystic ovary syndrome in adolescence: a prospective cohort study. *J Clin Endocrinol Metab* 94: 3714–3720.
108. Carmina E, Oberfield SE, Lobo RA (2010) The diagnosis of polycystic ovary syndrome in adolescents. *Am J Obstet Gynecol* 203: 201.e1–5.
109. Hickey M, Doherty DA, Atkinson H, Sloboda DM, Franks S, et al. (2011) Clinical, ultrasound and biochemical features of polycystic ovary syndrome in adolescents: implications for diagnosis. *Hum Reprod* 26: 1469–1477.
110. Cole B, Hensinger K, Maciel GA, Chang RJ, Erickson GF (2006) Human fetal ovary development involves the spatiotemporal expression of p450c17 protein. *J Clin Endocrinol Metab* 91: 3654–3661.
111. Barbieri RL, Saltzman DH, Torday JS, Randall RW, Frigoletto FD et al. (1986) Elevated concentrations of the b-subunit of human chorionic gonadotropin and testosterone in the amniotic fluid of gestations of diabetic mothers. *Am J Obstet Gynecol* 154: 1039–1043.
112. Abbott DH, Bruns CR, Barnett DK, Dunaif A, Goodfriend TL, et al. (2010) Experimentally induced gestational androgen excess disrupts glucoregulation in rhesus monkey dams and their female offspring. *Am J Physiol Endocrinol Metab* 299: E741–751.
113. Roos N, Kieler H, Sahlin L, Ekman-Ordeberg G, Falconer H, et al. (2011) Risk of adverse pregnancy outcomes in women with polycystic ovary syndrome: population based cohort study. *BMJ* 343: d6309.
114. Poretsky L, Cataldo NA, Rosenwaks Z, Giudice LC (1999) The insulin-related ovarian regulatory system in health and disease. *Endocr Rev* 20: 535–582.
115. Kemnitz JW, Elson DF, Roecker EB, Baum ST, Bergman RN et al. (1994) Pioglitazone increases insulin sensitivity, reduces blood glucose, insulin, and lipid levels, and lowers blood pressure, in obese, insulin-resistant rhesus monkeys. *Diabetes* 43: 204–211.
116. Dumesic DA, Abbott DH, Eisner JR, Goy RW (1997) Prenatal exposure of female rhesus monkeys to testosterone propionate increases serum luteinizing hormone levels in adulthood. *Fertil Steril* 67: 155–163.
117. Eisner JR, Barnett MA, Dumesic DA, Abbott DH (2002) Ovarian hyperandrogenism in adult female rhesus monkeys exposed to prenatal androgen excess. *Fertil Steril* 77: 167–172.
118. Zhou R, Bruns CM, Bird IM, Kemnitz JW, Goodfriend TL et al. (2007) Pioglitazone improves insulin action and normalizes menstrual cycles in a majority of prenatally androgenized female rhesus monkeys. *Reprod Toxicol* 23: 438–448.
119. Dierschke DJ, Clark JR (1976) Laparoscopy in *Macaca mulatta*: specialized equipment employed and initial observations. *J Med Primatol* 5: 100–110.
120. Zhou R, Bird IM, Dumesic DA, Abbott DH (2005) Adrenal hyperandrogenism is induced by fetal androgen excess in a rhesus monkey model of polycystic ovary syndrome. *J Clin Endocrinol Metab* 90: 6630–6637.
121. Dumesic DA, Schramm RD, Peterson E, Paprocki AM, Zhou R et al. (2002) Impaired developmental competence of oocytes in adult prenatally androgenized female rhesus monkeys undergoing gonadotropin stimulation for in vitro fertilization. *J Clin Endocrinol Metab* 87: 1111–1119.
122. Dumesic DA, Schramm RD, Bird IM, Peterson E, Paprocki AM, et al. (2003) Reduced intrafollicular androstenedione and estradiol levels in early-treated prenatally androgenized female rhesus monkeys receiving follicle-stimulating hormone therapy for *in vitro* fertilization. *Biol Reprod* 69: 1213–1219.
123. Colman RJ, Kemnitz JW, Lane MA, Abbott DH, Binkley N (1999) Skeletal effects of aging and menopausal status in female rhesus macaques. *J Clin Endocrinol Metab* 84: 4144–4148.
124. Voracek M, Manning JT, Dressler SG (2007) Repeatability and interobserver error of digit ratio (2D:4D) measurements made by experts. *Am J Hum Biol* 19: 142–146.
125. Angwin J, Lloyd A, Heald G, Nepom G, Binks M, et al. (2004) Radiographic hand joint space width assessed by computer is a sensitive measure of change in early rheumatoid arthritis. *J Rheumatol* 31: 1050–1061.
126. McFadden D, Bracht MS (2005) Sex differences in the relative lengths of metacarpals and metatarsals in gorillas and chimpanzees. *Horm Behav* 47: 99–111.
